# Supplementary material
Source: PubMed Central journal article supplement (PMC8851508)
Supplement: NIHMS1773756-supplement-1.pdf [file NIHMS1773756-supplement-1.pdf]

## Supplemental Figures

### Supplemental Figure 1

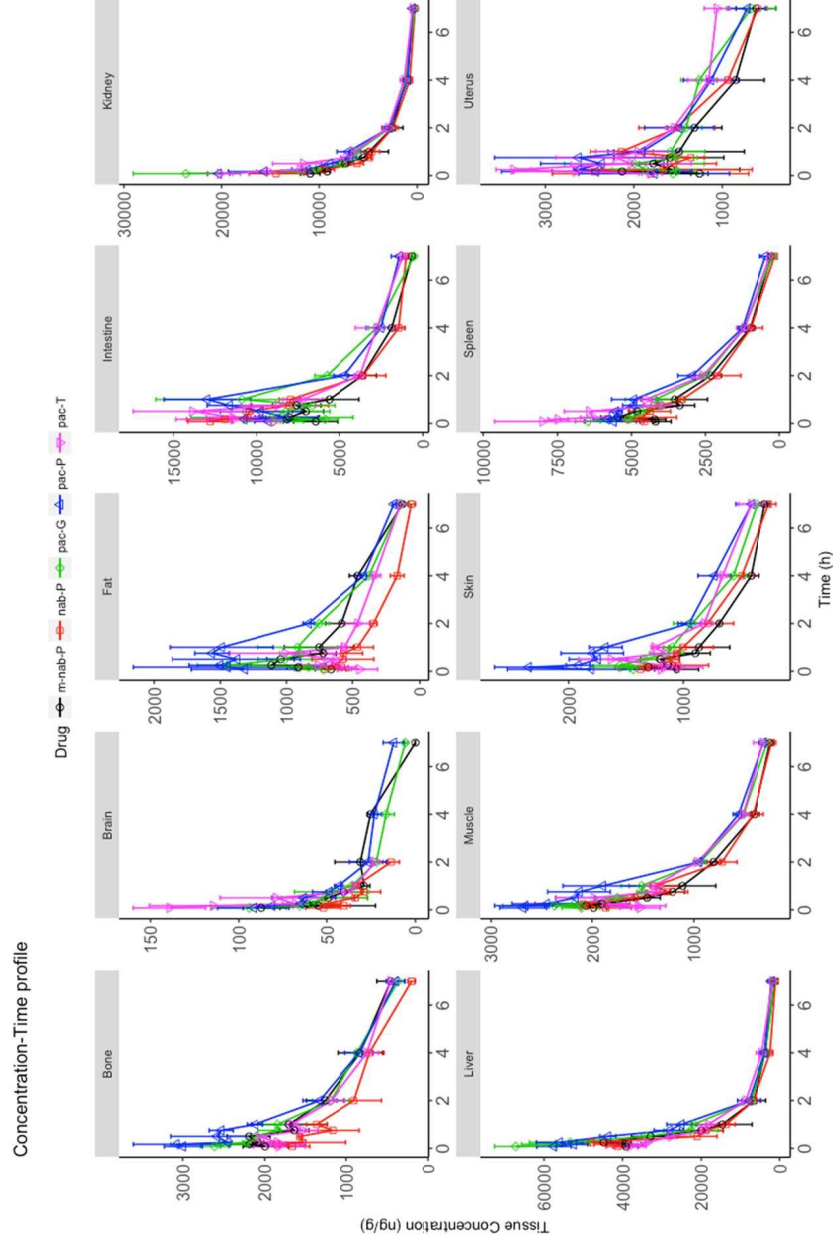

**Supplemental Fig. 1.** Total paclitaxel concentration-time profile in select tissues. Solvent-based paclitaxel (pac-T), *nab*-paclitaxel (*nab*-P), mouse albumin *nab*-paclitaxel (m-*nab*-P), micellar paclitaxel (pac-P), and polymeric nanoparticle paclitaxel (pac-G) have distinct tissue distributions.

## Supplemental Figure 2

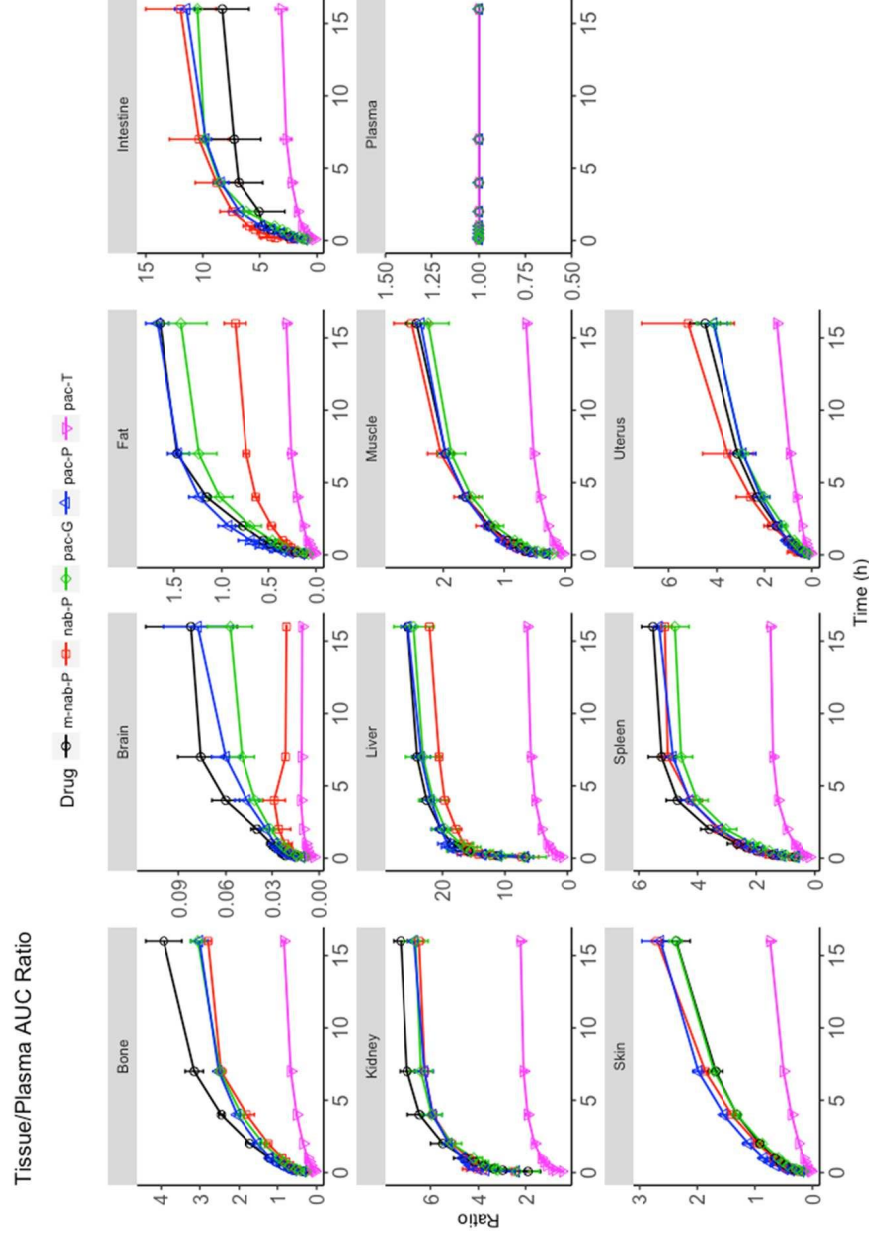

**Supplemental Fig 2.** The ratio of area under the curve ( $AUC_{0-t}$ ) between select tissues and plasma. Ratio (y-axis) of accumulated AUC in tissues scaled to its corresponding accumulated AUC of plasma for solvent-based paclitaxel (pac-T), *nab*-paclitaxel (*nab-P*), mouse albumin *nab*-paclitaxel (*m-nab-P*), micellar paclitaxel (pac-P), and polymeric nanoparticle paclitaxel (pac-G).

# Supplemental Figure 3

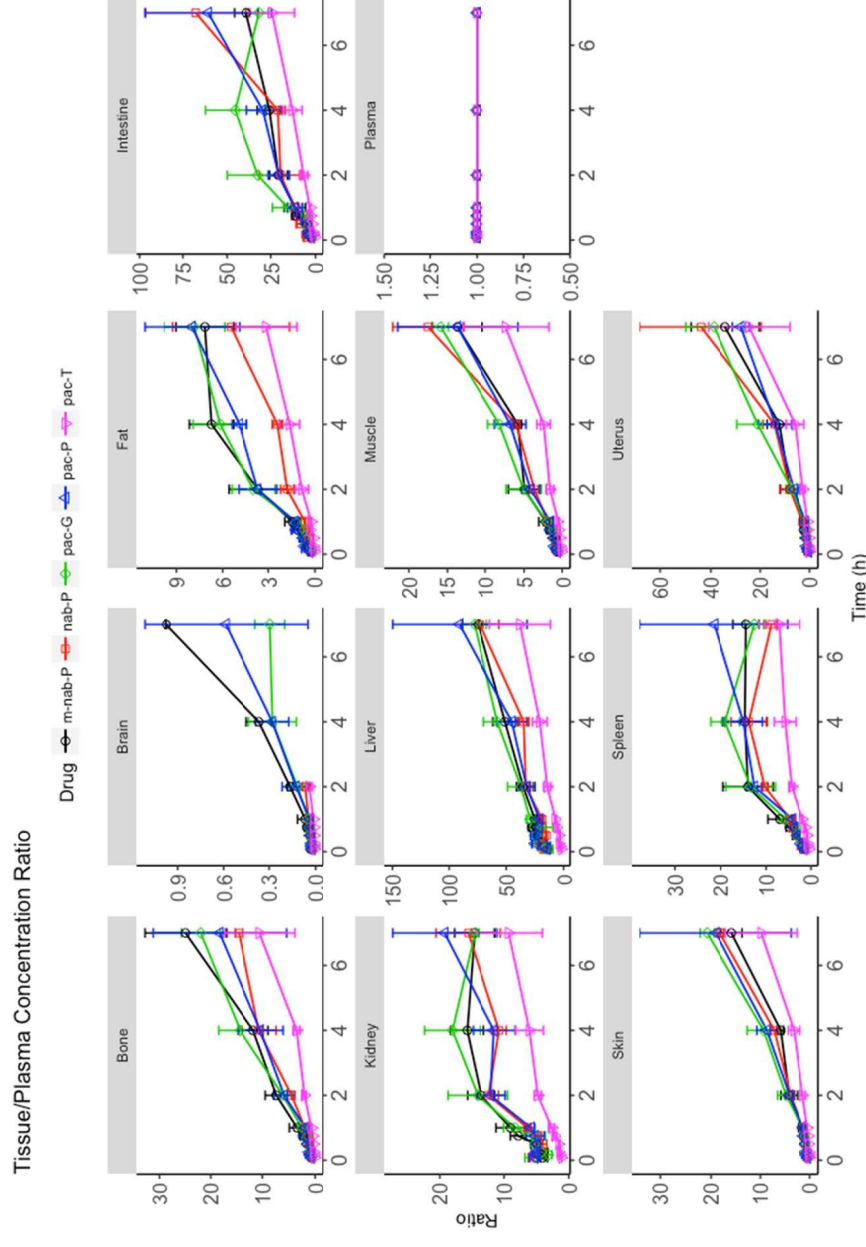

**Supplemental Fig. 3.** Ratios of total paclitaxel concentrations in select tissues scaled to corresponding plasma paclitaxel concentration at each time point for solvent-based paclitaxel (pac-T), *nab*-paclitaxel (*nab*-P), mouse albumin *nab*-paclitaxel (*m-nab*-P), micellar paclitaxel (pac-P), and polymeric nanoparticle paclitaxel (pac-G).

**Supplemental Table 1.** *P*-Values for Tissue/Plasma AUC Ratio Comparisons

| P-Values for Comparisons vs Pac-T |            |                |          | P-Values for Comparisons vs nab-P |                |                |  |
|-----------------------------------|------------|----------------|----------|-----------------------------------|----------------|----------------|--|
| nab-P vs Pac-T                    | m-nab-P vs |                | Pac-G vs |                                   | nab-P vs       |                |  |
|                                   | Pac-T      | Pac-P vs Pac-T | Pac-T    | m-nab-P                           | nab-P vs Pac-P | nab-P vs pac-G |  |
| Plasma                            | < .0001    | < .0001        | < .0001  | .8393                             | .0209          | .0454          |  |
| Blood                             | .0001      | < .0001        | < .0001  | .0909                             | .2101          | .7892          |  |
| Liver                             | .0549      | .0097          | .4657    | .3029                             | .0039          | .0810          |  |
| Stomach                           | .0114      | .2005          | .0785    | .0801                             | .0157          | .1540          |  |
| Muscle                            | .0091      | .0035          | .3203    | .6211                             | .0183          | .0497          |  |
| Skin                              | .0867      | .0009          | .0058    | .2349                             | .0598          | .8263          |  |
| Fat                               | .0006      | .2339          | .0166    | .0148                             | .0017          | .0014          |  |
| Spleen                            | .0178      | .0048          | .0793    | .4276                             | .0327          | .1379          |  |
| Lung                              | .0360      | .0006          | .0068    | .7132                             | .1713          | .4941          |  |
| Brain                             | .0544      | .0364          | .2005    | .0149                             | .0683          | .0455          |  |
| Uterus                            | .0001      | .0319          | .0451    | .6011                             | .4724          | .8343          |  |
| Intestine                         | .0625      | .0069          | .8335    | .1302                             | .0140          | .3726          |  |

|          |       |         |         |       |       |       |       |
|----------|-------|---------|---------|-------|-------|-------|-------|
| Pancreas | .0015 | .0003   | < .0001 | .0002 | .3250 | .0248 | .0331 |
| Kidney   | .0005 | .0007   | .9361   | .0387 | .0687 | .0085 | .0140 |
| Fat pad  | .0039 | .2627   | .0014   | .7759 | .1474 | .0006 | .0635 |
| Heart    | .0077 | < .0001 | .0277   | .0809 | .8184 | .0049 | .0210 |
| Bone     | .0185 | .1968   | .1631   | .4400 | .0147 | .0170 | .0240 |

AUC, area under the curve; m-*nab*-P, nanoparticle mouse albumin-bound paclitaxel; *nab*-P, nanoparticle albumin-bound paclitaxel; pac-G, polymeric nanoparticle paclitaxel; pac-P, micellar paclitaxel; pac-T, solvent-based paclitaxel.

**Supplemental Table 2.** *P*-Values for Tissue/Plasma  $C_{\max}$  Ratio Comparisons

| <i>P</i> -Values for Comparisons vs Pac-T |         |                     |                | <i>P</i> -Values for Comparisons vs <i>nab</i> -P |       |                  |                                               |
|-------------------------------------------|---------|---------------------|----------------|---------------------------------------------------|-------|------------------|-----------------------------------------------|
| <i>nab</i> -P vs Pac-T                    |         | m- <i>nab</i> -P vs |                | Pac-G vs                                          |       | <i>nab</i> -P vs |                                               |
|                                           | Pac-T   |                     | Pac-P vs Pac-T |                                                   | Pac-T | m- <i>nab</i> -P | <i>nab</i> -P vs Pac-P <i>nab</i> -P vs pac-G |
| Plasma                                    | < .0001 | < .0001             | < .0001        | < .0001                                           | .7876 | .2114            | .0151                                         |
| Blood                                     | < .0001 | < .0001             | .0001          | < .0001                                           | .0758 | .4540            | .1584                                         |
| Liver                                     | .0309   | .3059               | < .0001        | .0046                                             | .6743 | .0257            | .0277                                         |
| Stomach                                   | .6923   | .0935               | .0013          | .0056                                             | .3878 | .0096            | .0175                                         |
| Muscle                                    | .7182   | .6867               | .0159          | .1431                                             | .9482 | .1486            | .4706                                         |
| Skin                                      | .5413   | .3599               | .0264          | .5704                                             | .8208 | .0469            | .4375                                         |

|           |        |        |        |       |       |       |       |
|-----------|--------|--------|--------|-------|-------|-------|-------|
| Fat       | .4388  | .3850  | .0905  | .2208 | .2684 | .0765 | .1673 |
| Spleen    | .0013  | .0003  | .0012  | .0016 | .9047 | .2309 | .0761 |
| Lung      | .0030  | .0004  | .0981  | .1263 | .7437 | .0025 | .0728 |
| Brain     | <.0001 | .0063  | .0483  | .0768 | .0452 | .0691 | .1181 |
| Uterus    | .0043  | .0138  | .3054  | .0176 | .0716 | .7362 | .0881 |
| Intestine | .3294  | .0001  | .0215  | .4388 | .0413 | .9224 | .9528 |
| Pancreas  | .4147  | .1355  | <.0001 | .1254 | .9368 | .2107 | .9098 |
| Kidney    | .0380  | <.0001 | .8710  | .3778 | .0942 | .0655 | .0915 |
| Fat pad   | .8441  | .0843  | <.0001 | .2439 | .2629 | .0356 | .3300 |
| Heart     | .0052  | .0009  | .0317  | .1063 | .4317 | .0085 | .0146 |
| Bone      | .0252  | .3585  | .0123  | .0083 | .0782 | .0069 | .0042 |

$C_{\max}$ , maximum concentration; m-*nab*-P, nanoparticle mouse albumin-bound paclitaxel; *nab*-P, nanoparticle albumin-bound paclitaxel; pac-G, polymeric nanoparticle paclitaxel; pac-P, micellar paclitaxel; pac-T, solvent-based paclitaxel.
